# Supplementary material
Source: PubMed Central journal article supplement (PMC3745596)
Supplement: 12_260_Wang.Suppl.pdf [file 12_260_Wang.Suppl.pdf]

Supplemental Data

**MFG-E8 and HMGB1 Are Involved in the Mechanism Underlying Alcohol-Induced Impairment of Macrophage Efferocytosis**

Xiao Wang,<sup>1,2</sup> Heng-Fu Bu,<sup>1,2</sup> Wei Zhong,<sup>3</sup> Akihiro Asai,<sup>1,2</sup> Zhanxiang Zhou,<sup>3</sup> and Xiao-Di Tan<sup>1,2</sup>

Online address: <http://www.molmed.org>

The Feinstein Institute for Medical Research 

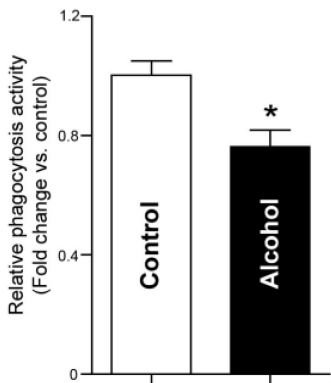

**Supplementary Figure S1.** Kupffer cell-derived macrophage efferocytosis is inhibited by alcohol exposure. RKC1 cells (Kupffer cell-derived macrophages) were subjected to treatment with culture medium alone (i.e. control) or medium containing alcohol (25 mM) for 18 h as indicated in the figure. After treatments, macrophages were cocultured with apoptotic thymocytes in the 1:4 ratio for 90 min, washed with PBS, and processed for staining and analysis of macrophages with engulfed apoptotic thymocytes using flow cytometry as described in Materials and Methods. Three independent experiments provided similar results. n=3. \*  $P < 0.05$  versus the control group. Values are mean  $\pm$  S.E.M.

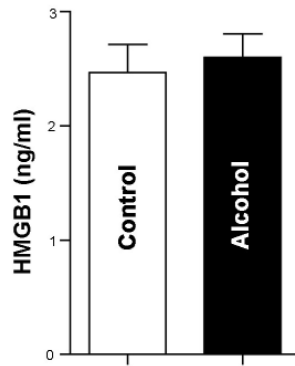

**Supplementary Figure S2.** Effect of acute alcohol exposure on secretion of HMGB1 by macrophages. Murine peritoneal macrophages were treated with culture medium alone (i.e. control) or medium containing alcohol (25 mM) for 18 h as indicated in the figure. At the end of treatments, culture medium was harvested followed by processing for quantification of the levels HMGB1 with an ELISA. The experiments were performed twice with triplicates. Results are expressed as mean  $\pm$  S.E.M. n = 3.
